# Supplementary material for: Silver Nanoparticles in the Lung: Toxic Effects and Focal Accumulation of Silver in Remote Organs
Source: Nanomaterials (Basel). 2017 Dec 12;7(12):441. doi: 10.3390/nano7120441 (PMC5746931; doi:10.3390/nano7120441)
Supplement: Supplementary file 1 [file nanomaterials-07-00441-s001.pdf]

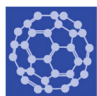

# Silver Nanoparticles in the Lung: Toxic Effects and Focal Accumulation of Silver in Remote Organs

## Supplementary Material

**Martin Wiemann <sup>1\*</sup>, Antje Vennemann <sup>1</sup>, Franziska Blaske <sup>2</sup>, Michael Sperling <sup>2</sup>, Uwe Karst <sup>2</sup>**

<sup>1</sup> IBE R&D Institute for Lung Health gGmbH, Mendelstr. 11, 48149 Münster, Germany; vennemann@ibe-ms.de

<sup>2</sup> Institute of Inorganic and Analytical Chemistry, University of Münster, Corrensstr. 30, 48149 Münster, Germany; franziska.blaske@googlemail.com; msperlin@uni-muenster.de; uk@uni-muenster.de

\* Correspondence: martin.wiemann@ibe-ms.de; Tel.: +49-251-9802340

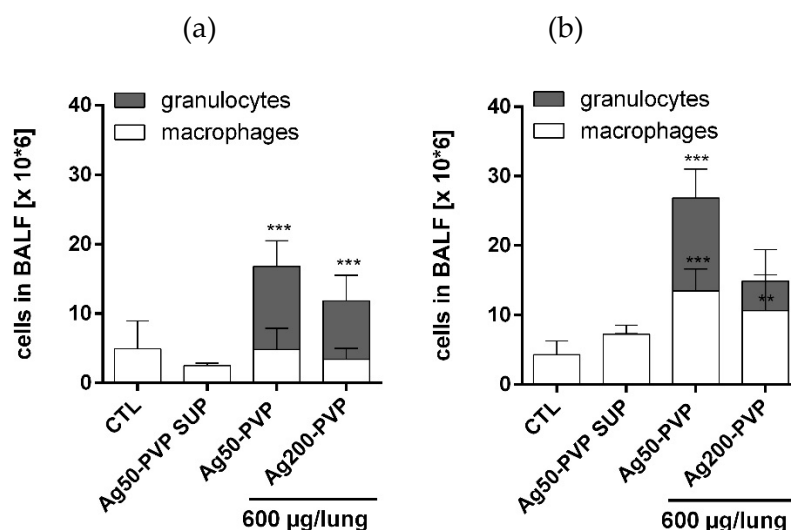

**Figure S1.** Changes in broncho-alveolar lavage fluid from rat lungs intratracheally instilled with 600 µg of silver nanoparticles. Comparison of Ag50-PVP and larger Ag200-PVP with the particle diminished supernatant (Ag50-PVP SUP) prepared from Ag50-PVP and vehicle treated control are shown after 3 (a) and 21 days (b). Note that at both time points the significant increase of granulocytes and macrophages versus vehicle-treated animals (CTL) was larger for Ag50-PVP. No effects were noticed for the particle diminished supernatant Ag50-PVP SUP vs. vehicle-treated animals; \*\*=  $p \leq 0.01$ , \*\*\*=  $p \leq 0.001$ , according to one way ANOVA.

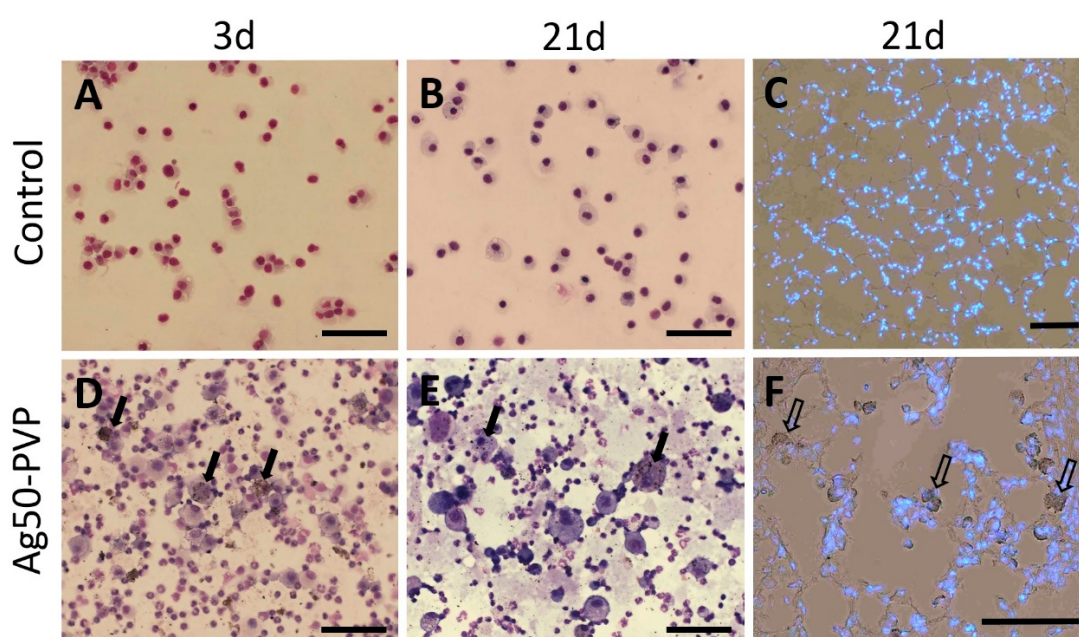

**Figure S2.** Aspects from BALF and lung tissue after intratracheal instillation of rat lungs with 600 µg Ag50-PVP. Papanicolaou-stained cytopsin preparation of BALF cells from vehicle-treated (A, B) and Ag50-PVP-treated rats (D, E) after 3 and 21 days. (C, F) show a vehicle- (C) and Ag50-PVP-treated lung (F) stained for nuclear DNA with DAPI (blue), a low bright field illumination was added to show lung structure. Ag50-PVP increases inflammatory cells in BALF and locally destroys septal structure of the lung; black arrows in (D, E) point to Ag-laden macrophages; open arrows in (F) indicate Ag-laden macrophage-like structures bordering compromised lung areas.

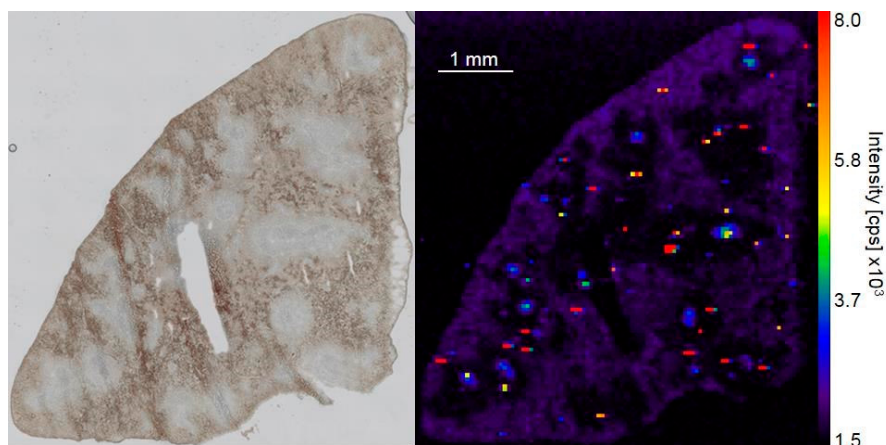

**Figure S3.** Bright field microphotograph of an unfixed spleen cryo-section from a rat intratracheally instilled with 300  $\mu\text{g}$  Ag50-PVP. Left: Red and white pulp can be easily distinguished. Right: Non-calibrated silver distribution map of the respective spleen section; note the high congruency of the low silver signal ( $^{107}\text{Ag}$ ) with the red pulp; intense spots are mainly found in the white pulp.

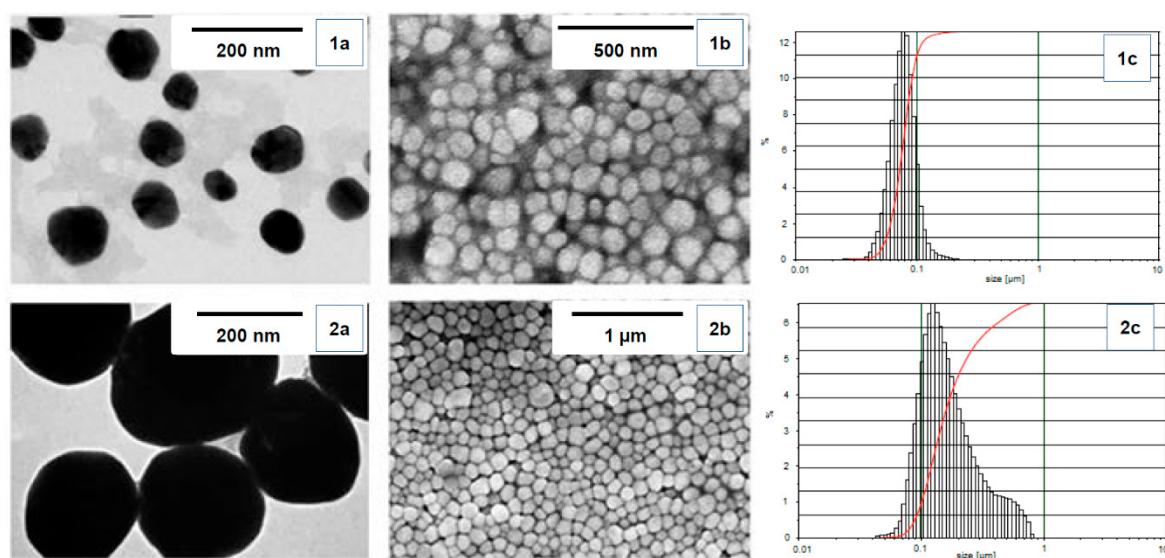

**Figure S4.** Size characterization of the silver nanoparticles Ag50-PVP. Upper and lower images show data for Ag50-PVP (1) and Ag200-PVP (2), respectively. (1a, 2a) transmission electron microscopy, (1b, 2b) scanning electron microscopy, (1c, 2c) analytical ultracentrifugation (Images from [53], with permission).

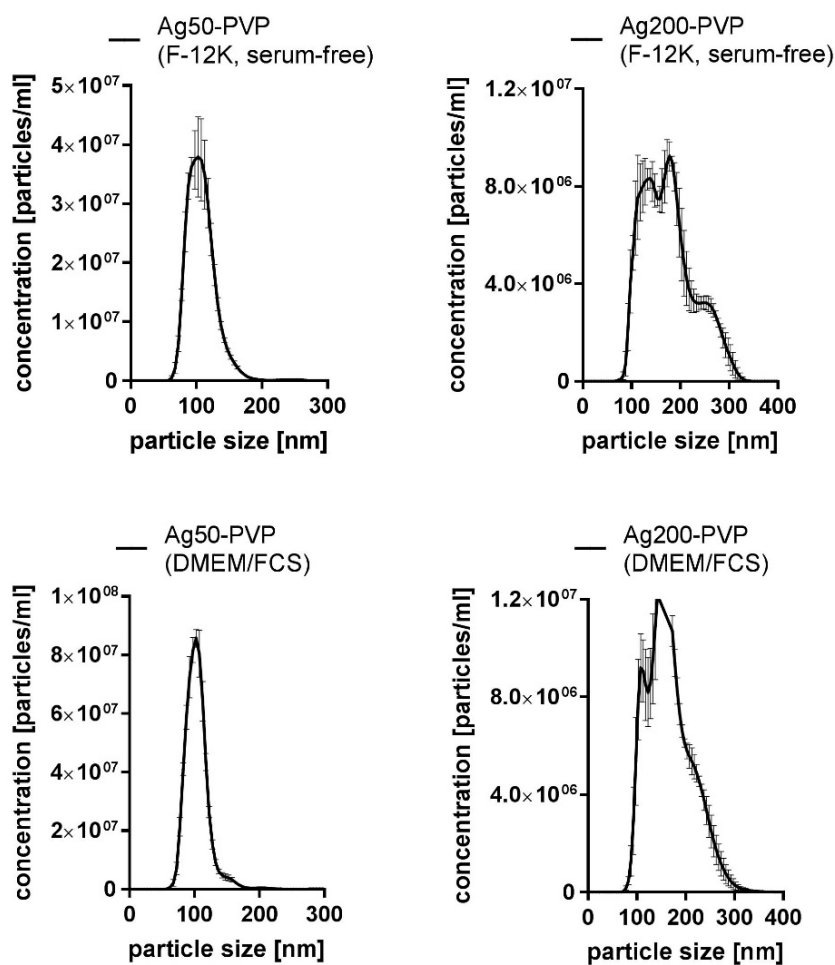

**Figure S5.** Hydrodynamic diameter of the silver nanoparticles Ag50-PVP and Ag200-PVP. Particles were dispersed in either serum-free F-12K medium (upper graphs), or in DMEM containing 10% fetal calf serum (FCS) using the stirring protocol (lower graphs). All particle suspensions were diluted at least 100-fold with serum-free medium (F-12K or DMEM) to avoid interference of serum proteins with optical particle tracking. Curves were averaged from three measurements whose mean and mode values are shown in the main text.

**Table S1.** Characterization data of Ag50-PVP and Ag200-PVP [53].

|                                                                     | <b>Ag50-PVP</b>                                                                                                                                 | <b>Ag200-PVP</b>                                                                                                                                  |
|---------------------------------------------------------------------|-------------------------------------------------------------------------------------------------------------------------------------------------|---------------------------------------------------------------------------------------------------------------------------------------------------|
| <b>Shape</b>                                                        | Quasi spherical                                                                                                                                 | Quasi spherical                                                                                                                                   |
| <b>Concentration</b>                                                | 10 % (wt/wt)                                                                                                                                    | 10 % (wt/wt)                                                                                                                                      |
| <b>Size/size distribution &amp; aggregation/agglomeration state</b> | DLS-agglomerates size: 123 nm<br>TEM: d <sub>50</sub> = 79 nm, d <sub>90</sub> = 99 nm<br>AC: d <sub>50</sub> = 77 nm, d <sub>90</sub> = 101 nm | DLS-agglomerates size: 408 nm<br>TEM: d <sub>50</sub> = 134 nm, d <sub>90</sub> = 300 nm<br>AC: d <sub>50</sub> = 95 nm, d <sub>90</sub> = 188 nm |
| <b>Crystal structure</b>                                            | Cubic                                                                                                                                           | Cubic                                                                                                                                             |
| <b>Surface chemistry</b>                                            | XPS: Atom% C 59.1, O 17.5, Ag 15.9, Na 7.5<br>SIMS: Ag, Cl, C <sub>x</sub> H <sub>y</sub> O <sub>z</sub>                                        | XPS: Atom % C 77.2, O 10.7, Ag 0.4, N 11.7, Na 1.0<br>SIMS: C <sub>x</sub> H <sub>y</sub> O <sub>z</sub>                                          |
| <b>Surface charge</b>                                               | Zeta potential: - 12.5 mV+/- 0.5                                                                                                                | Zeta potential: - 5.5 mV+/- 0.5                                                                                                                   |

TEM: transmission electron microscopy; BET: nitrogen adsorbing surface according to the Brunauer-Emmett-Teller equation; AC: analytical ultracentrifugation; XPS: X-ray photoelectron spectroscopy (Table taken from [53], with permission)

**Table S2.** Applied parameters for the microwave digestion of liver samples

| Parameter        | #1 | #2  | #3  | #4  | #5  | #6  | #7  |
|------------------|----|-----|-----|-----|-----|-----|-----|
| Time [min]       | 5  | 10  | 15  | 20  | 30  | 35  | 40  |
| Temperature [°C] | 20 | 100 | 100 | 150 | 150 | 175 | 175 |
| Power [W]        | -  | 800 | 800 | 800 | 800 | 800 | 800 |
